# Supplementary material for: Using Shapley additive explanations to interpret extreme gradient boosting predictions of grassland degradation in Xilingol, China
Source: Copernicus journal article supplement (doi:10.5194/gmd-14-1493-2021), 2021-03-16
Supplement: Supplementary file 2 [file gmd-14-1493-2021-supplement.zip]

Archive with 9 entries (9 files):
- Fig. S8 Under-sampling simulation results for different sampling size.pdf
- gmd-14-1493-2021-supplement-title-page.pdf
- Fig. S3 Data organisation and the four sampling strategies used in this study.tif
- Fig. S2 Assumptions on policy effect in the policy scenario setting..tif
- Fig. S6 Maps of prediction results with top four drivers in Figure 5 and observed values.tif
- Fig. S4 The workflow of the machine leaning process in this study.tif
- Fig. S1 Grassland degradation between 1975 and 2015.tif
- Fig. S7 The number of pixels in which a driver is dominant. This analysis is limited to only the primary drivers.pdf
- Fig. S5 Values obtained for a-, recall and ACC using the recursive elimination method.pdf
