# Supplementary figures and images for: Using Shapley additive explanations to interpret extreme gradient boosting predictions of grassland degradation in Xilingol, China
Source: Copernicus journal article supplement (doi:10.5194/gmd-14-1493-2021), 2021-03-16

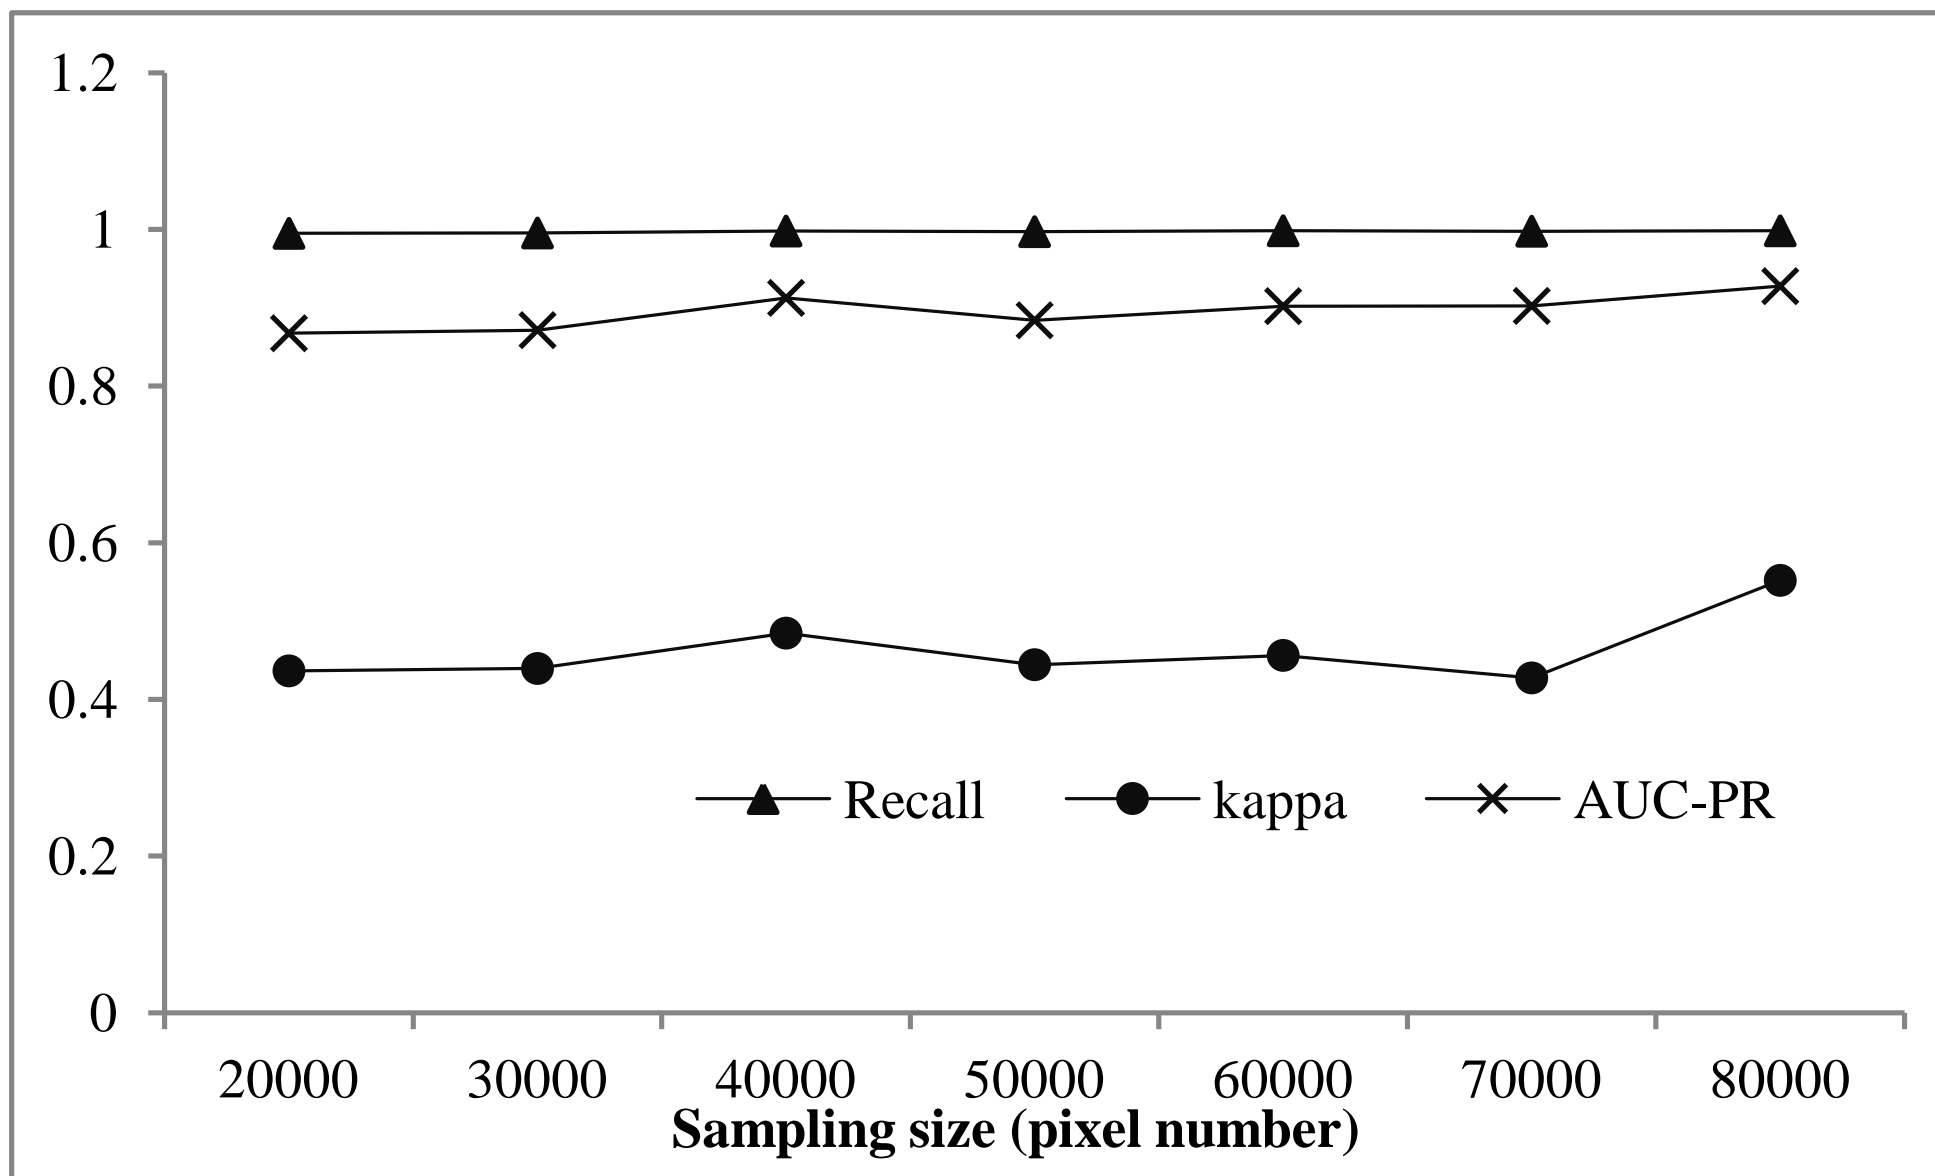

Supplement: Supplementary file 1 [file gmd-14-1493-2021-supplement.zip]

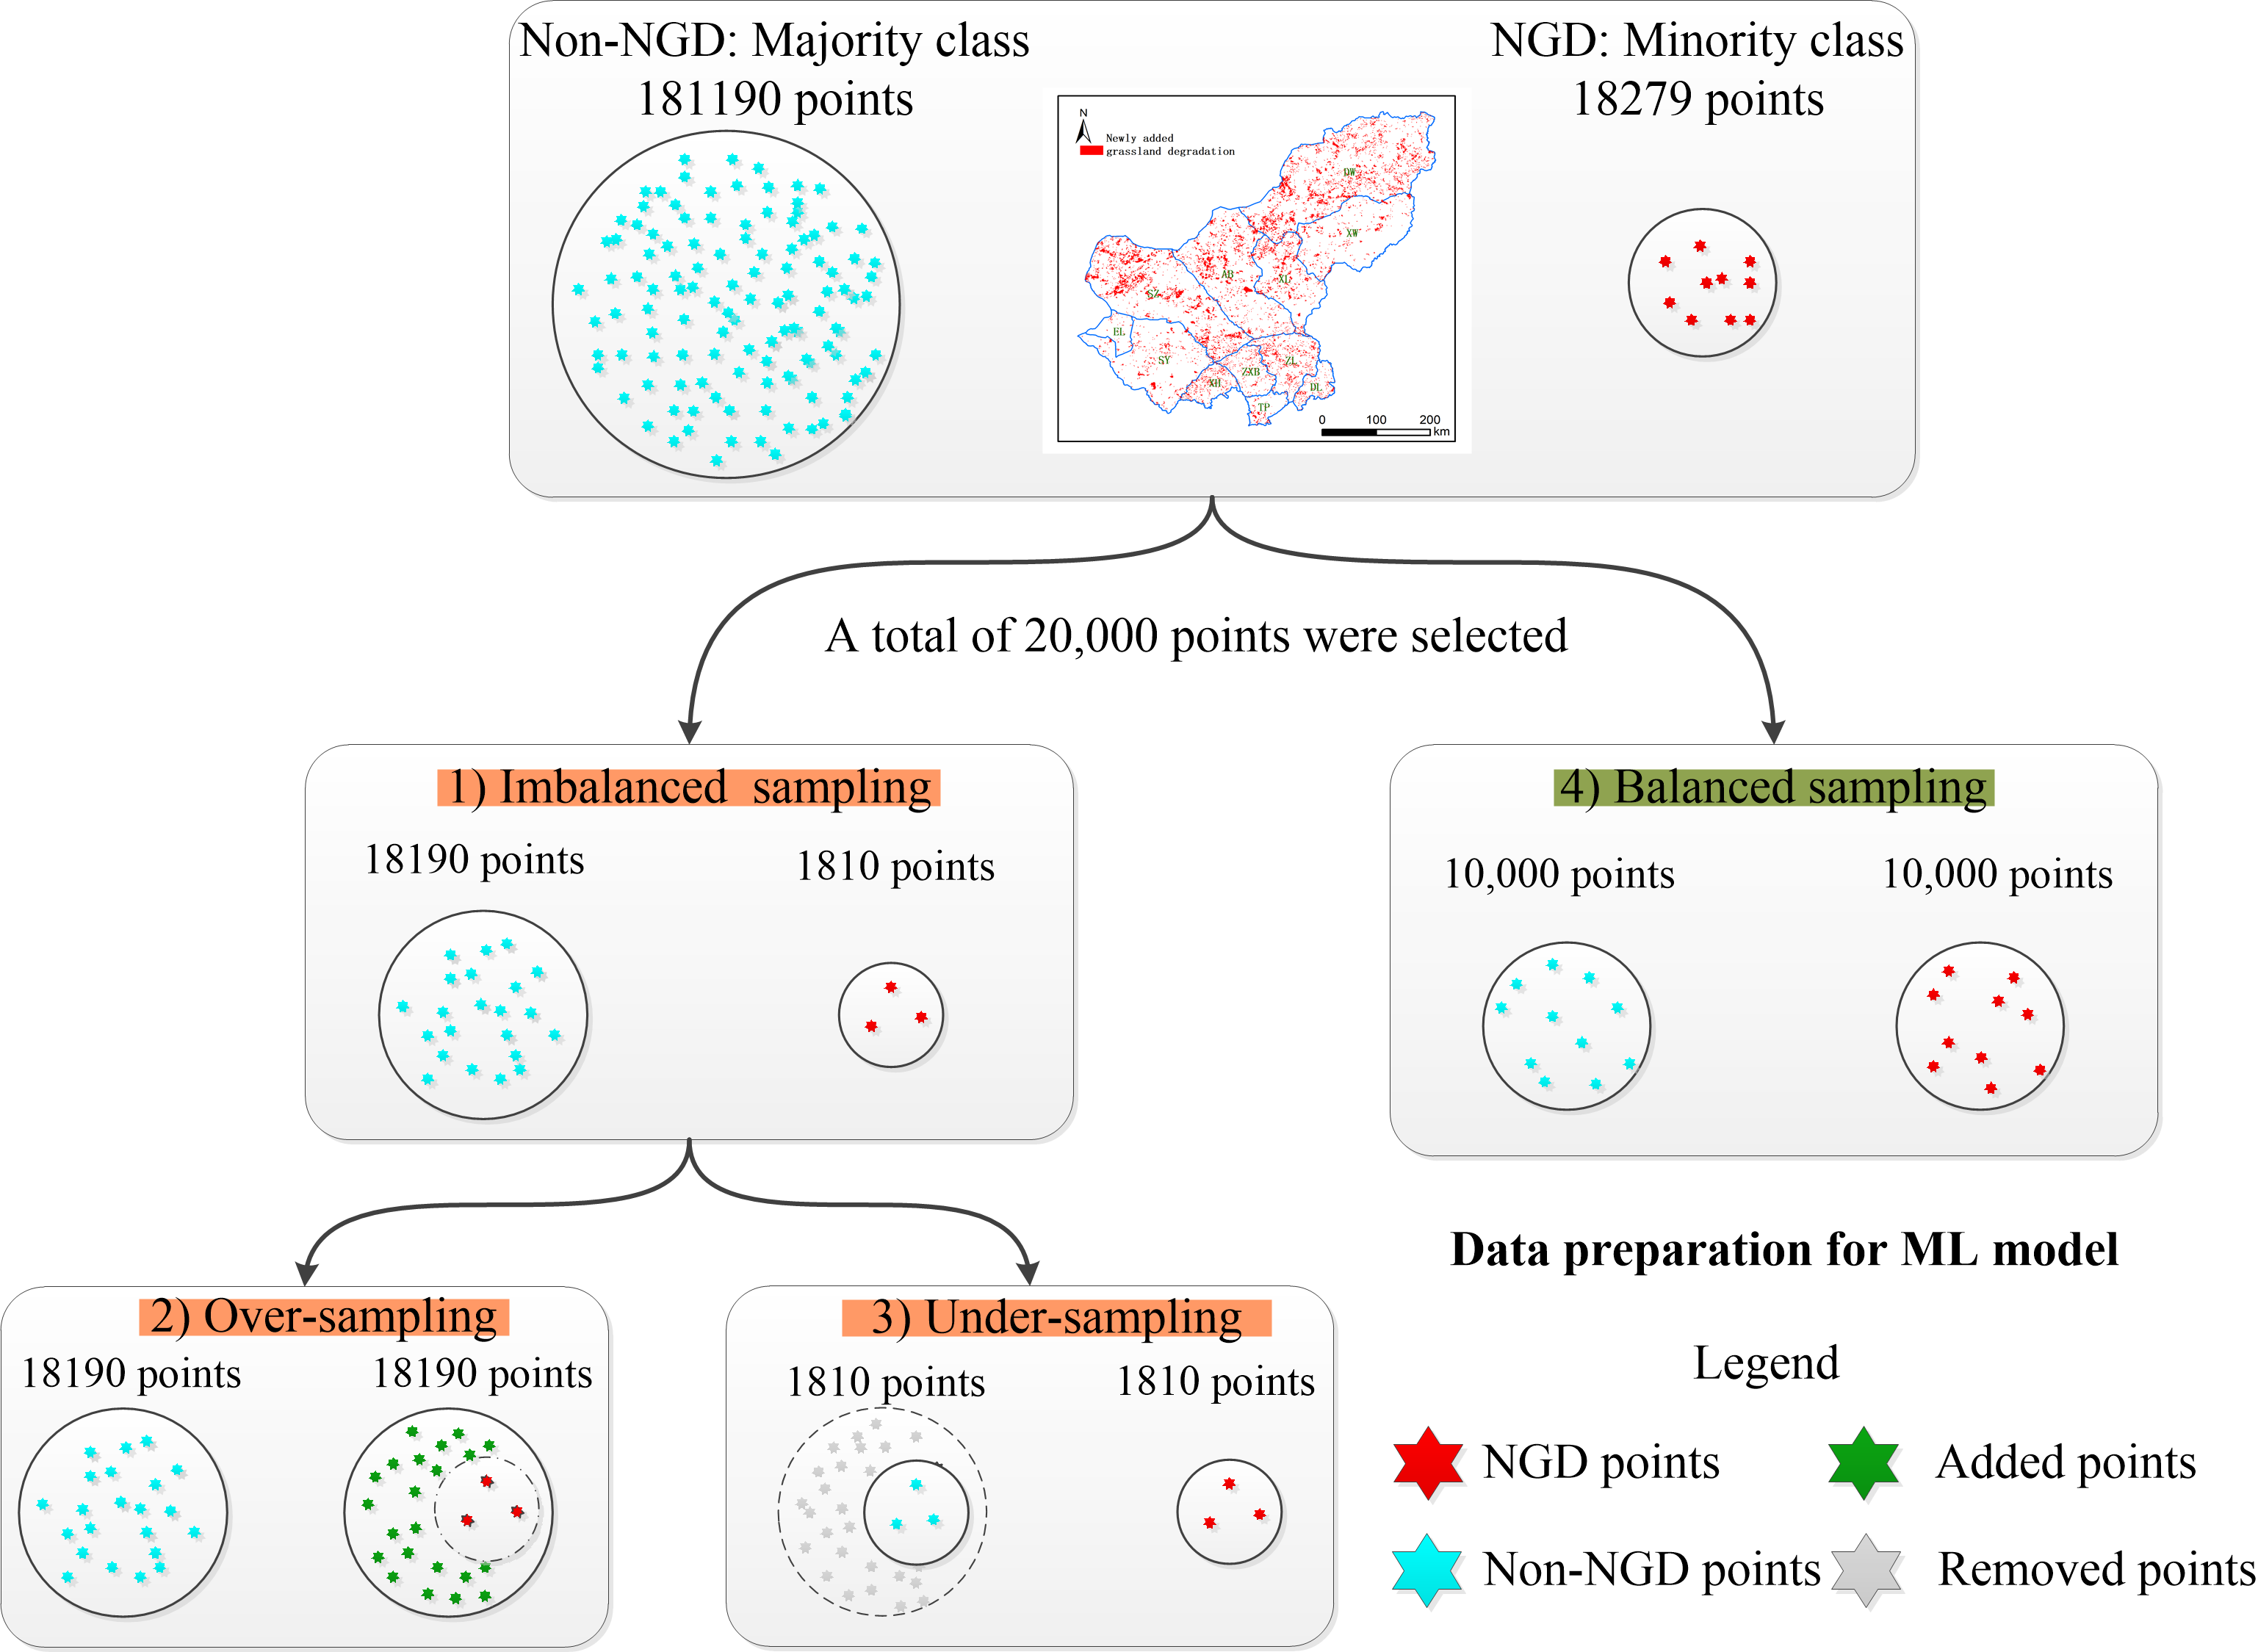

Supplement: Supplementary file 2 [file gmd-14-1493-2021-supplement.zip › Fig. S3 Data organisation and the four sampling strategies used in this study.tif]

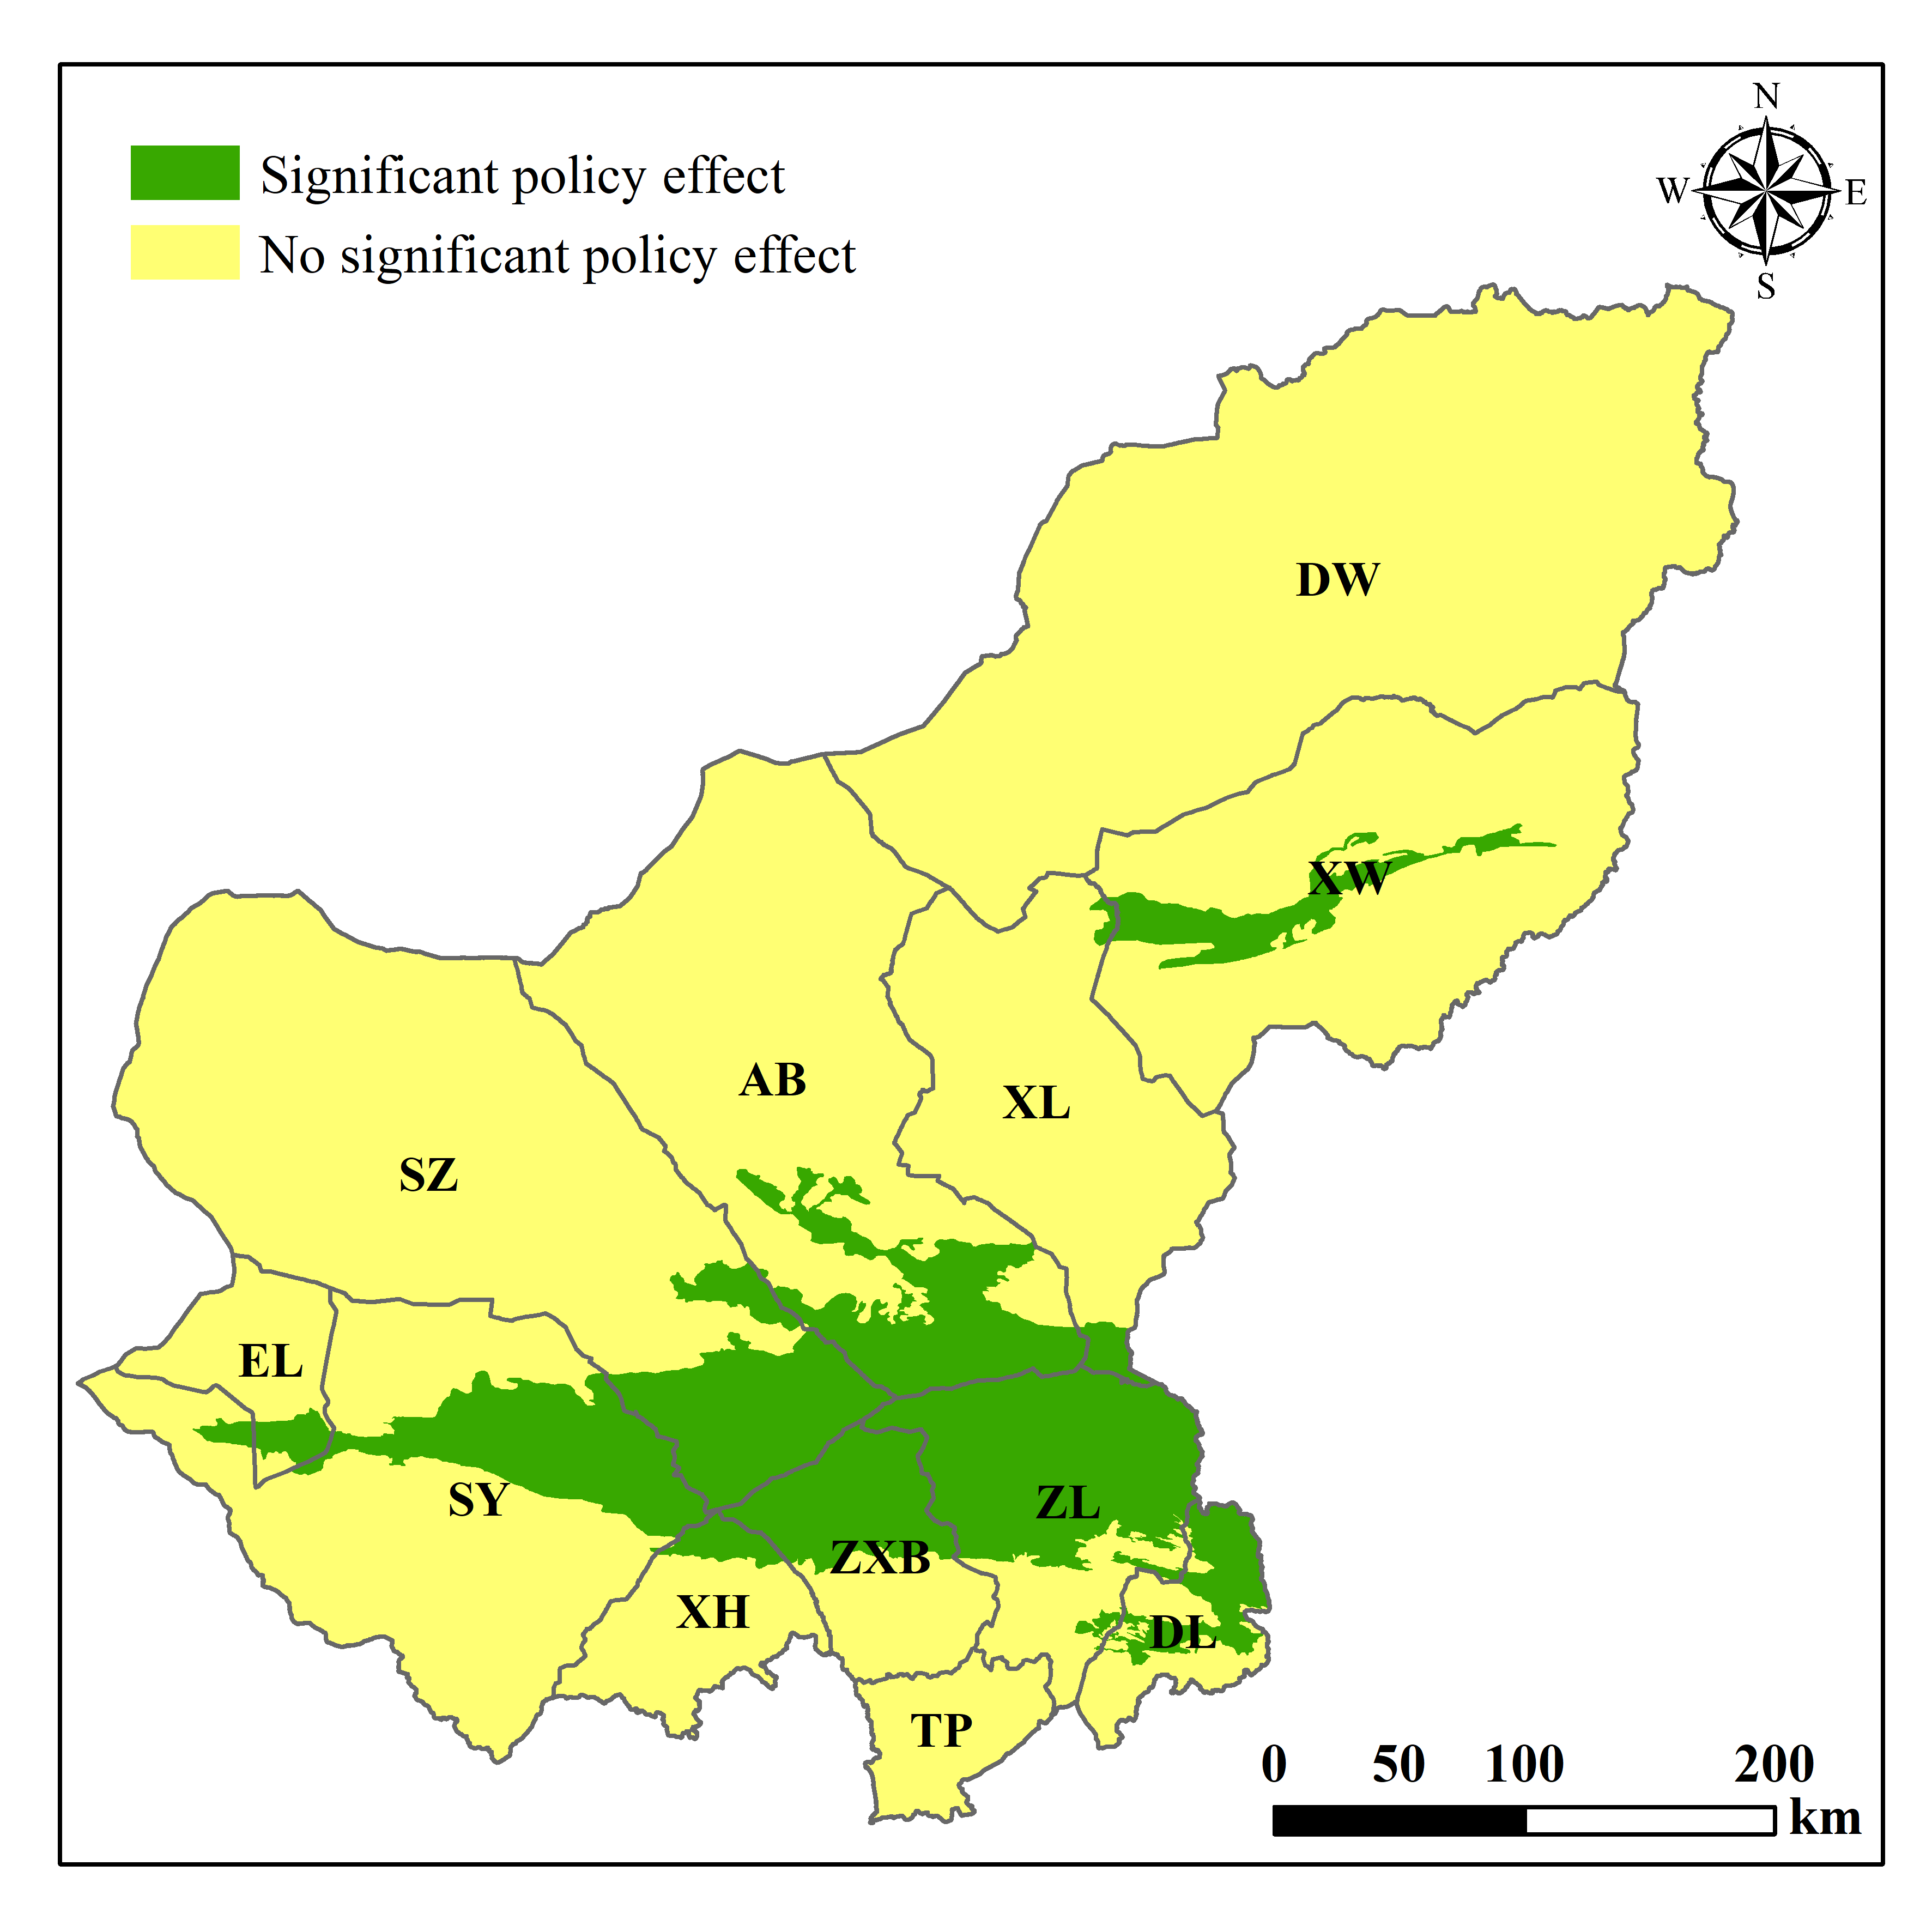

Supplement: Supplementary file 2 [file gmd-14-1493-2021-supplement.zip › Fig. S2 Assumptions on policy effect in the policy scenario setting..tif]

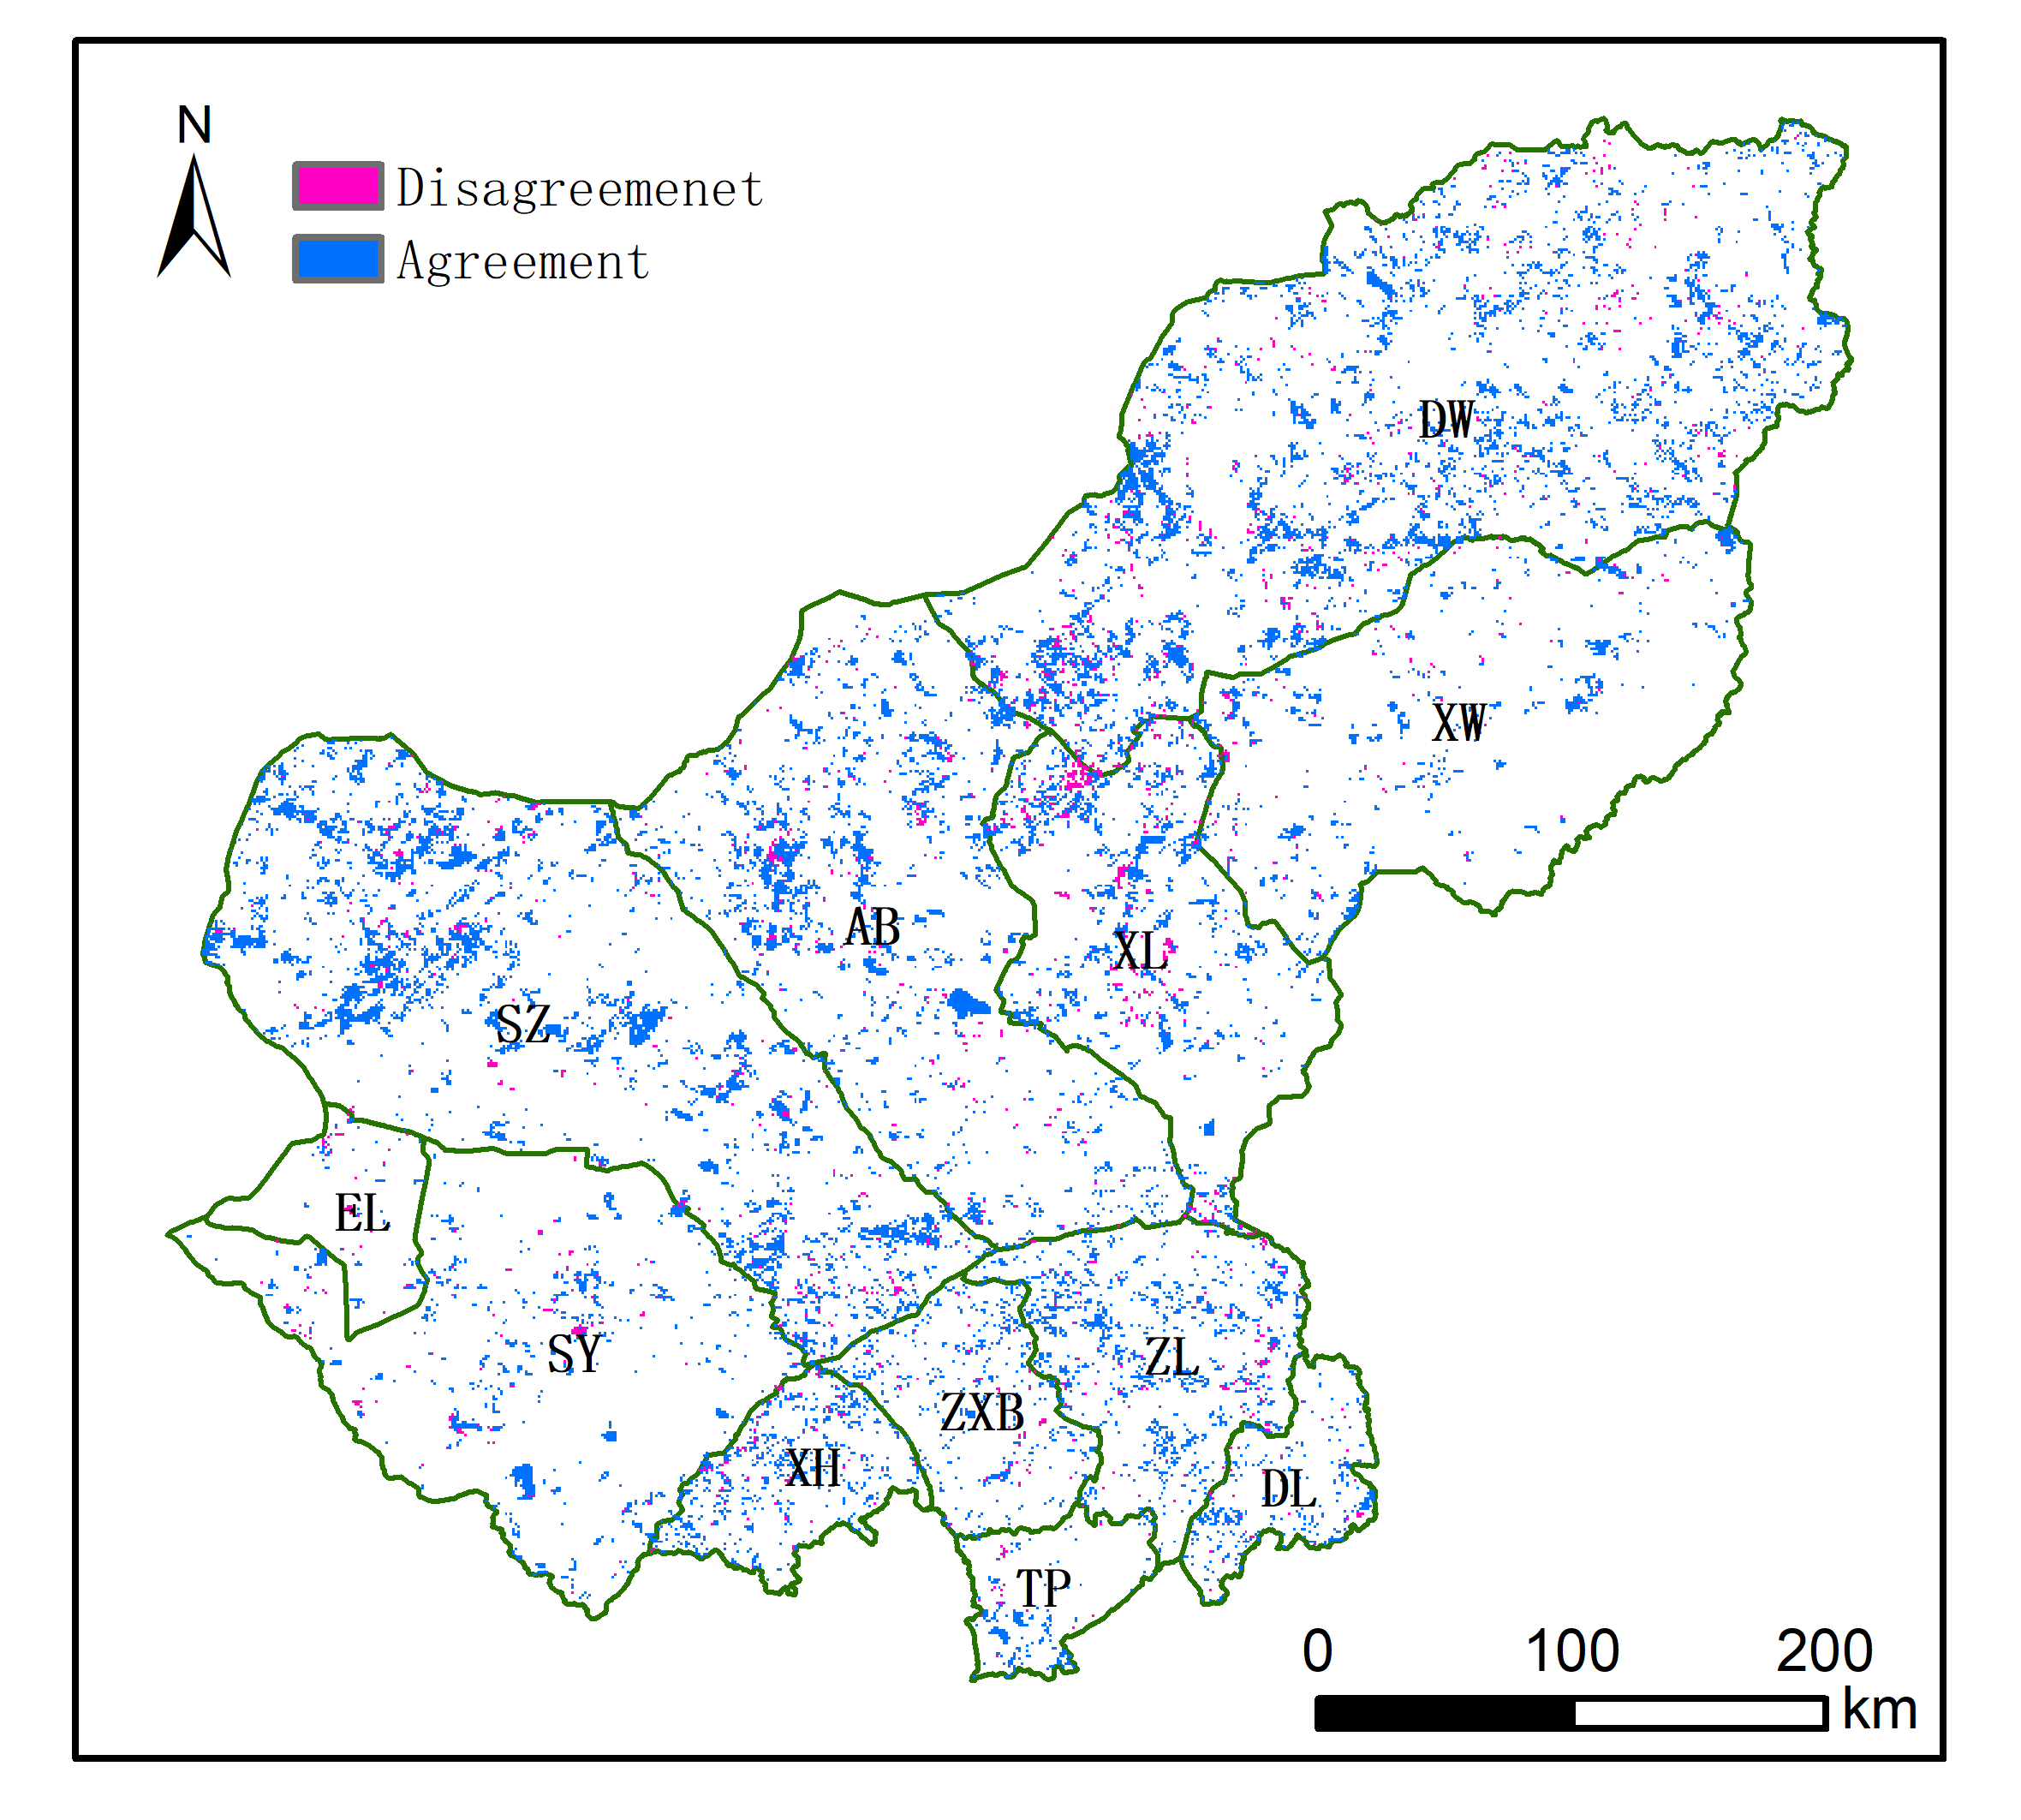

Supplement: Supplementary file 2 [file gmd-14-1493-2021-supplement.zip › Fig. S6 Maps of prediction results with top four drivers in Figure 5 and observed values.tif]

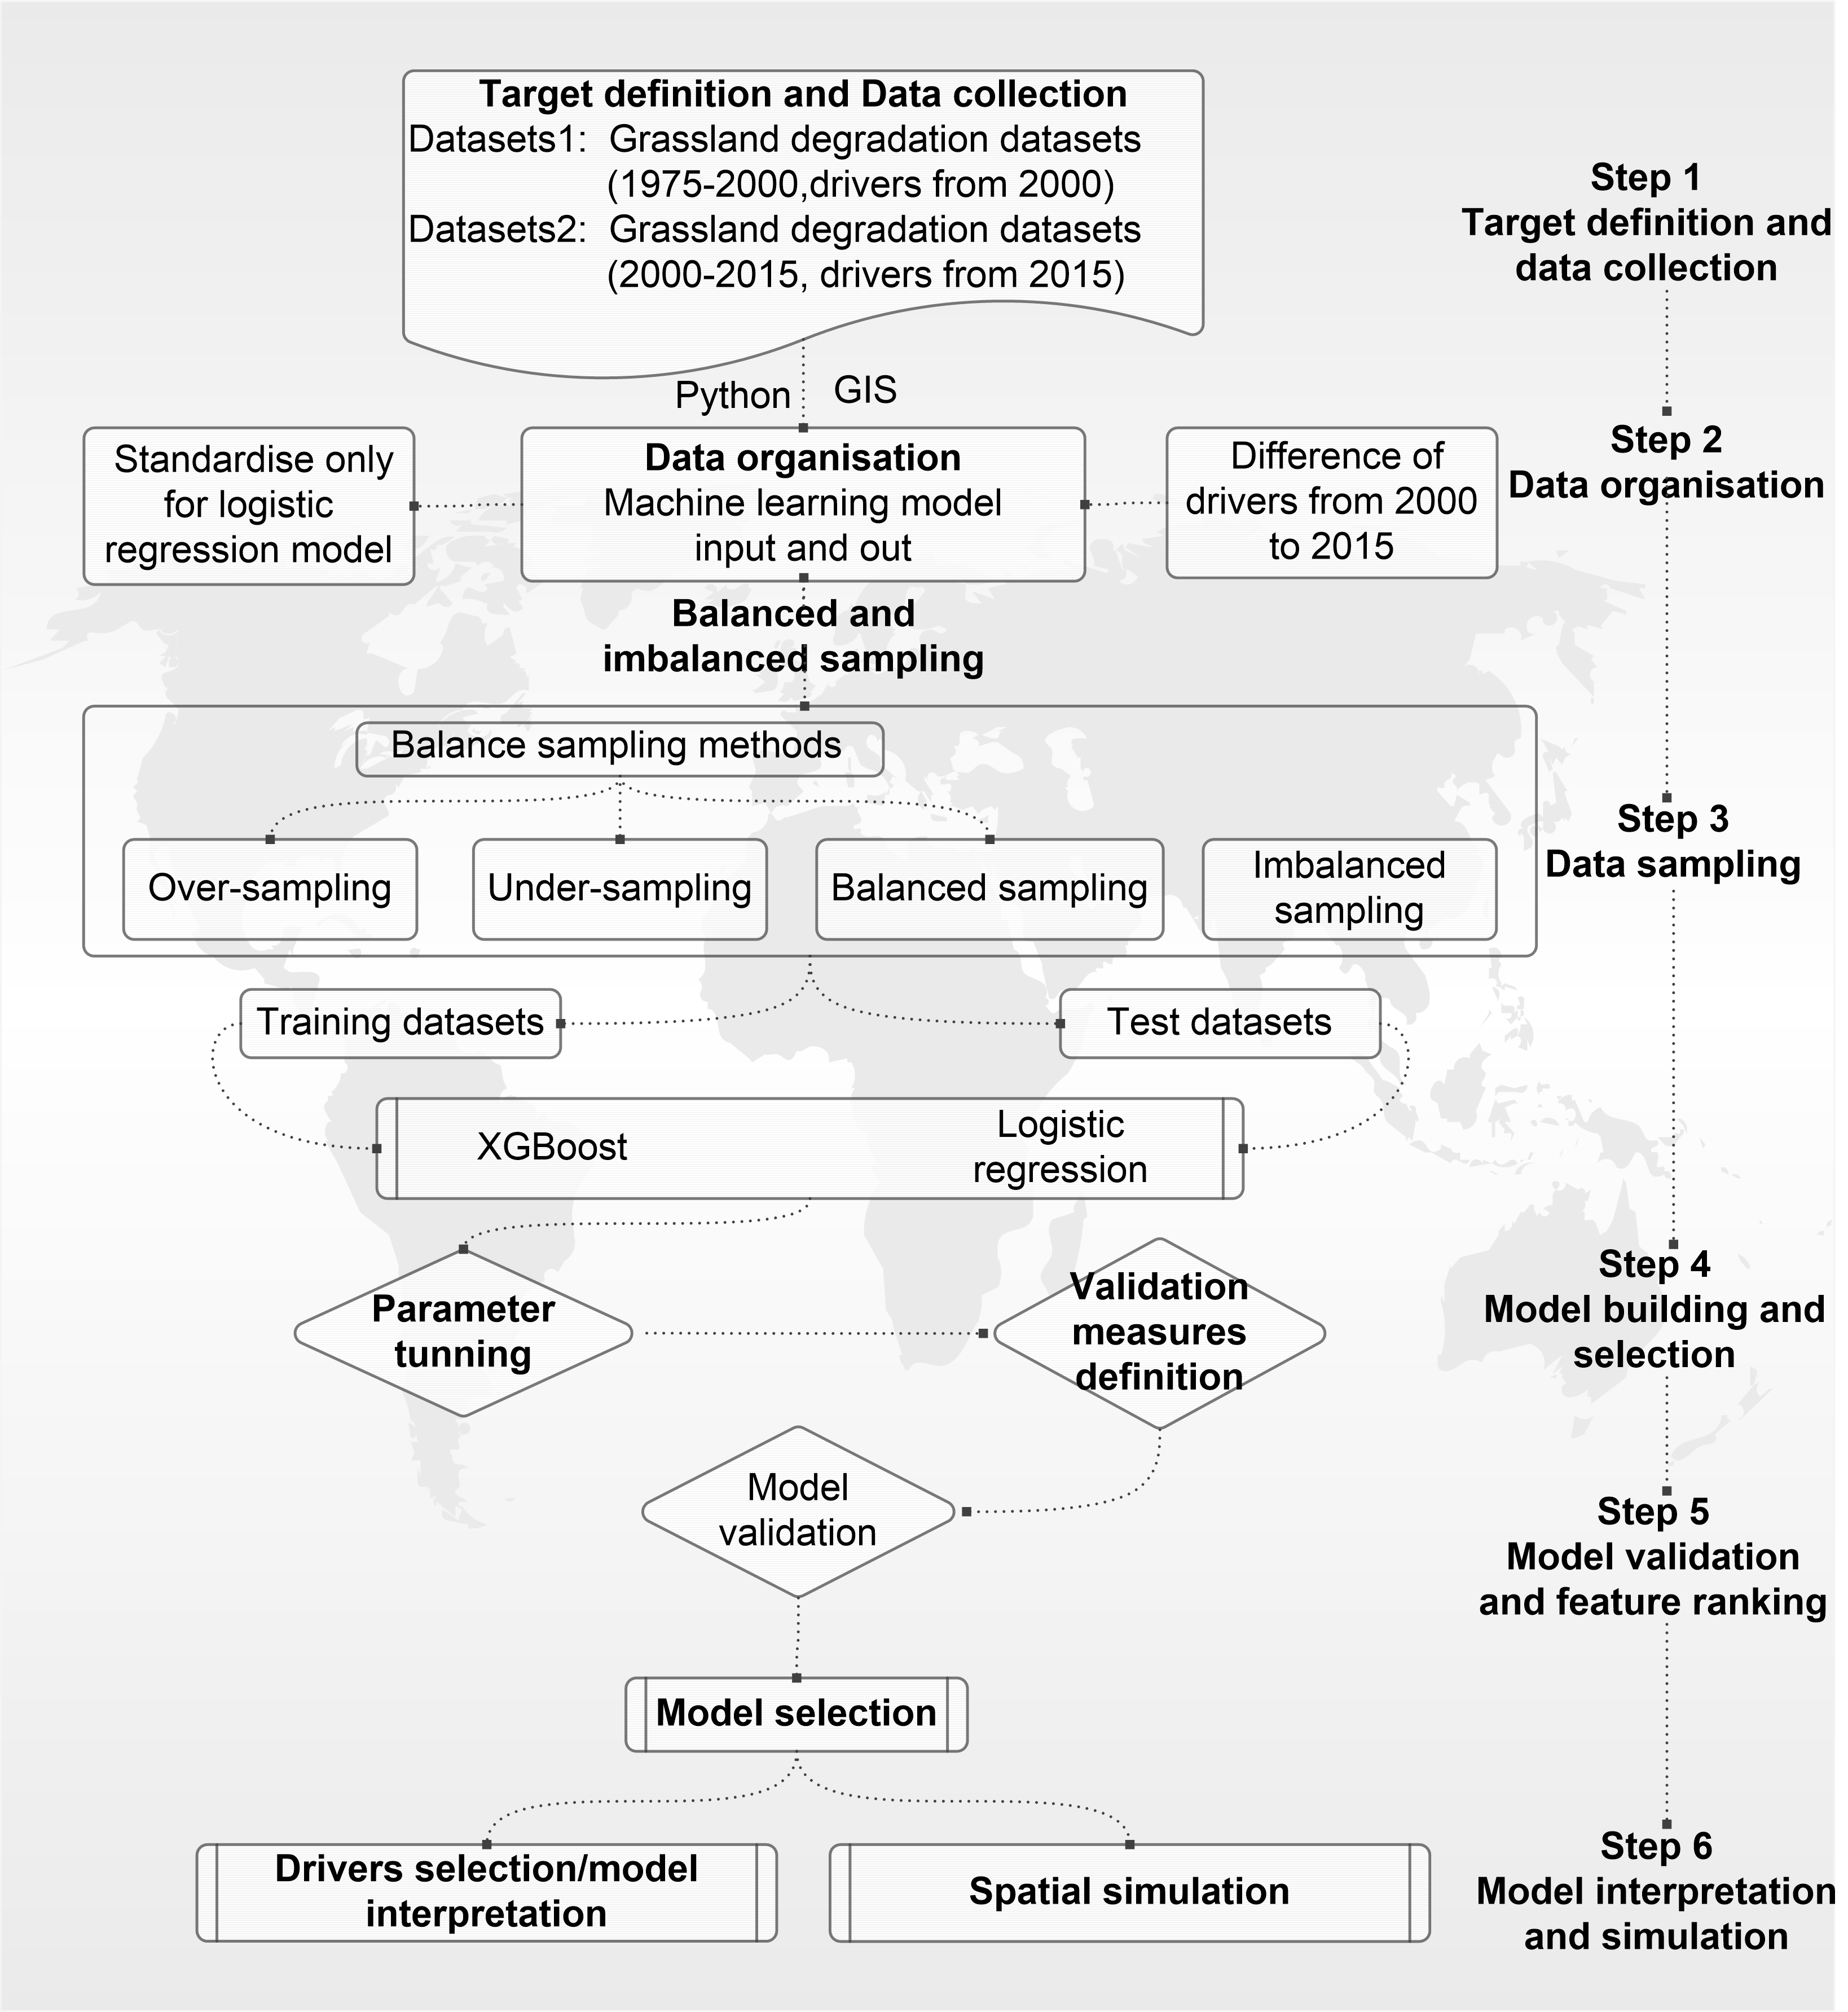

Supplement: Supplementary file 2 [file gmd-14-1493-2021-supplement.zip › Fig. S4 The workflow of the machine leaning process in this study.tif]

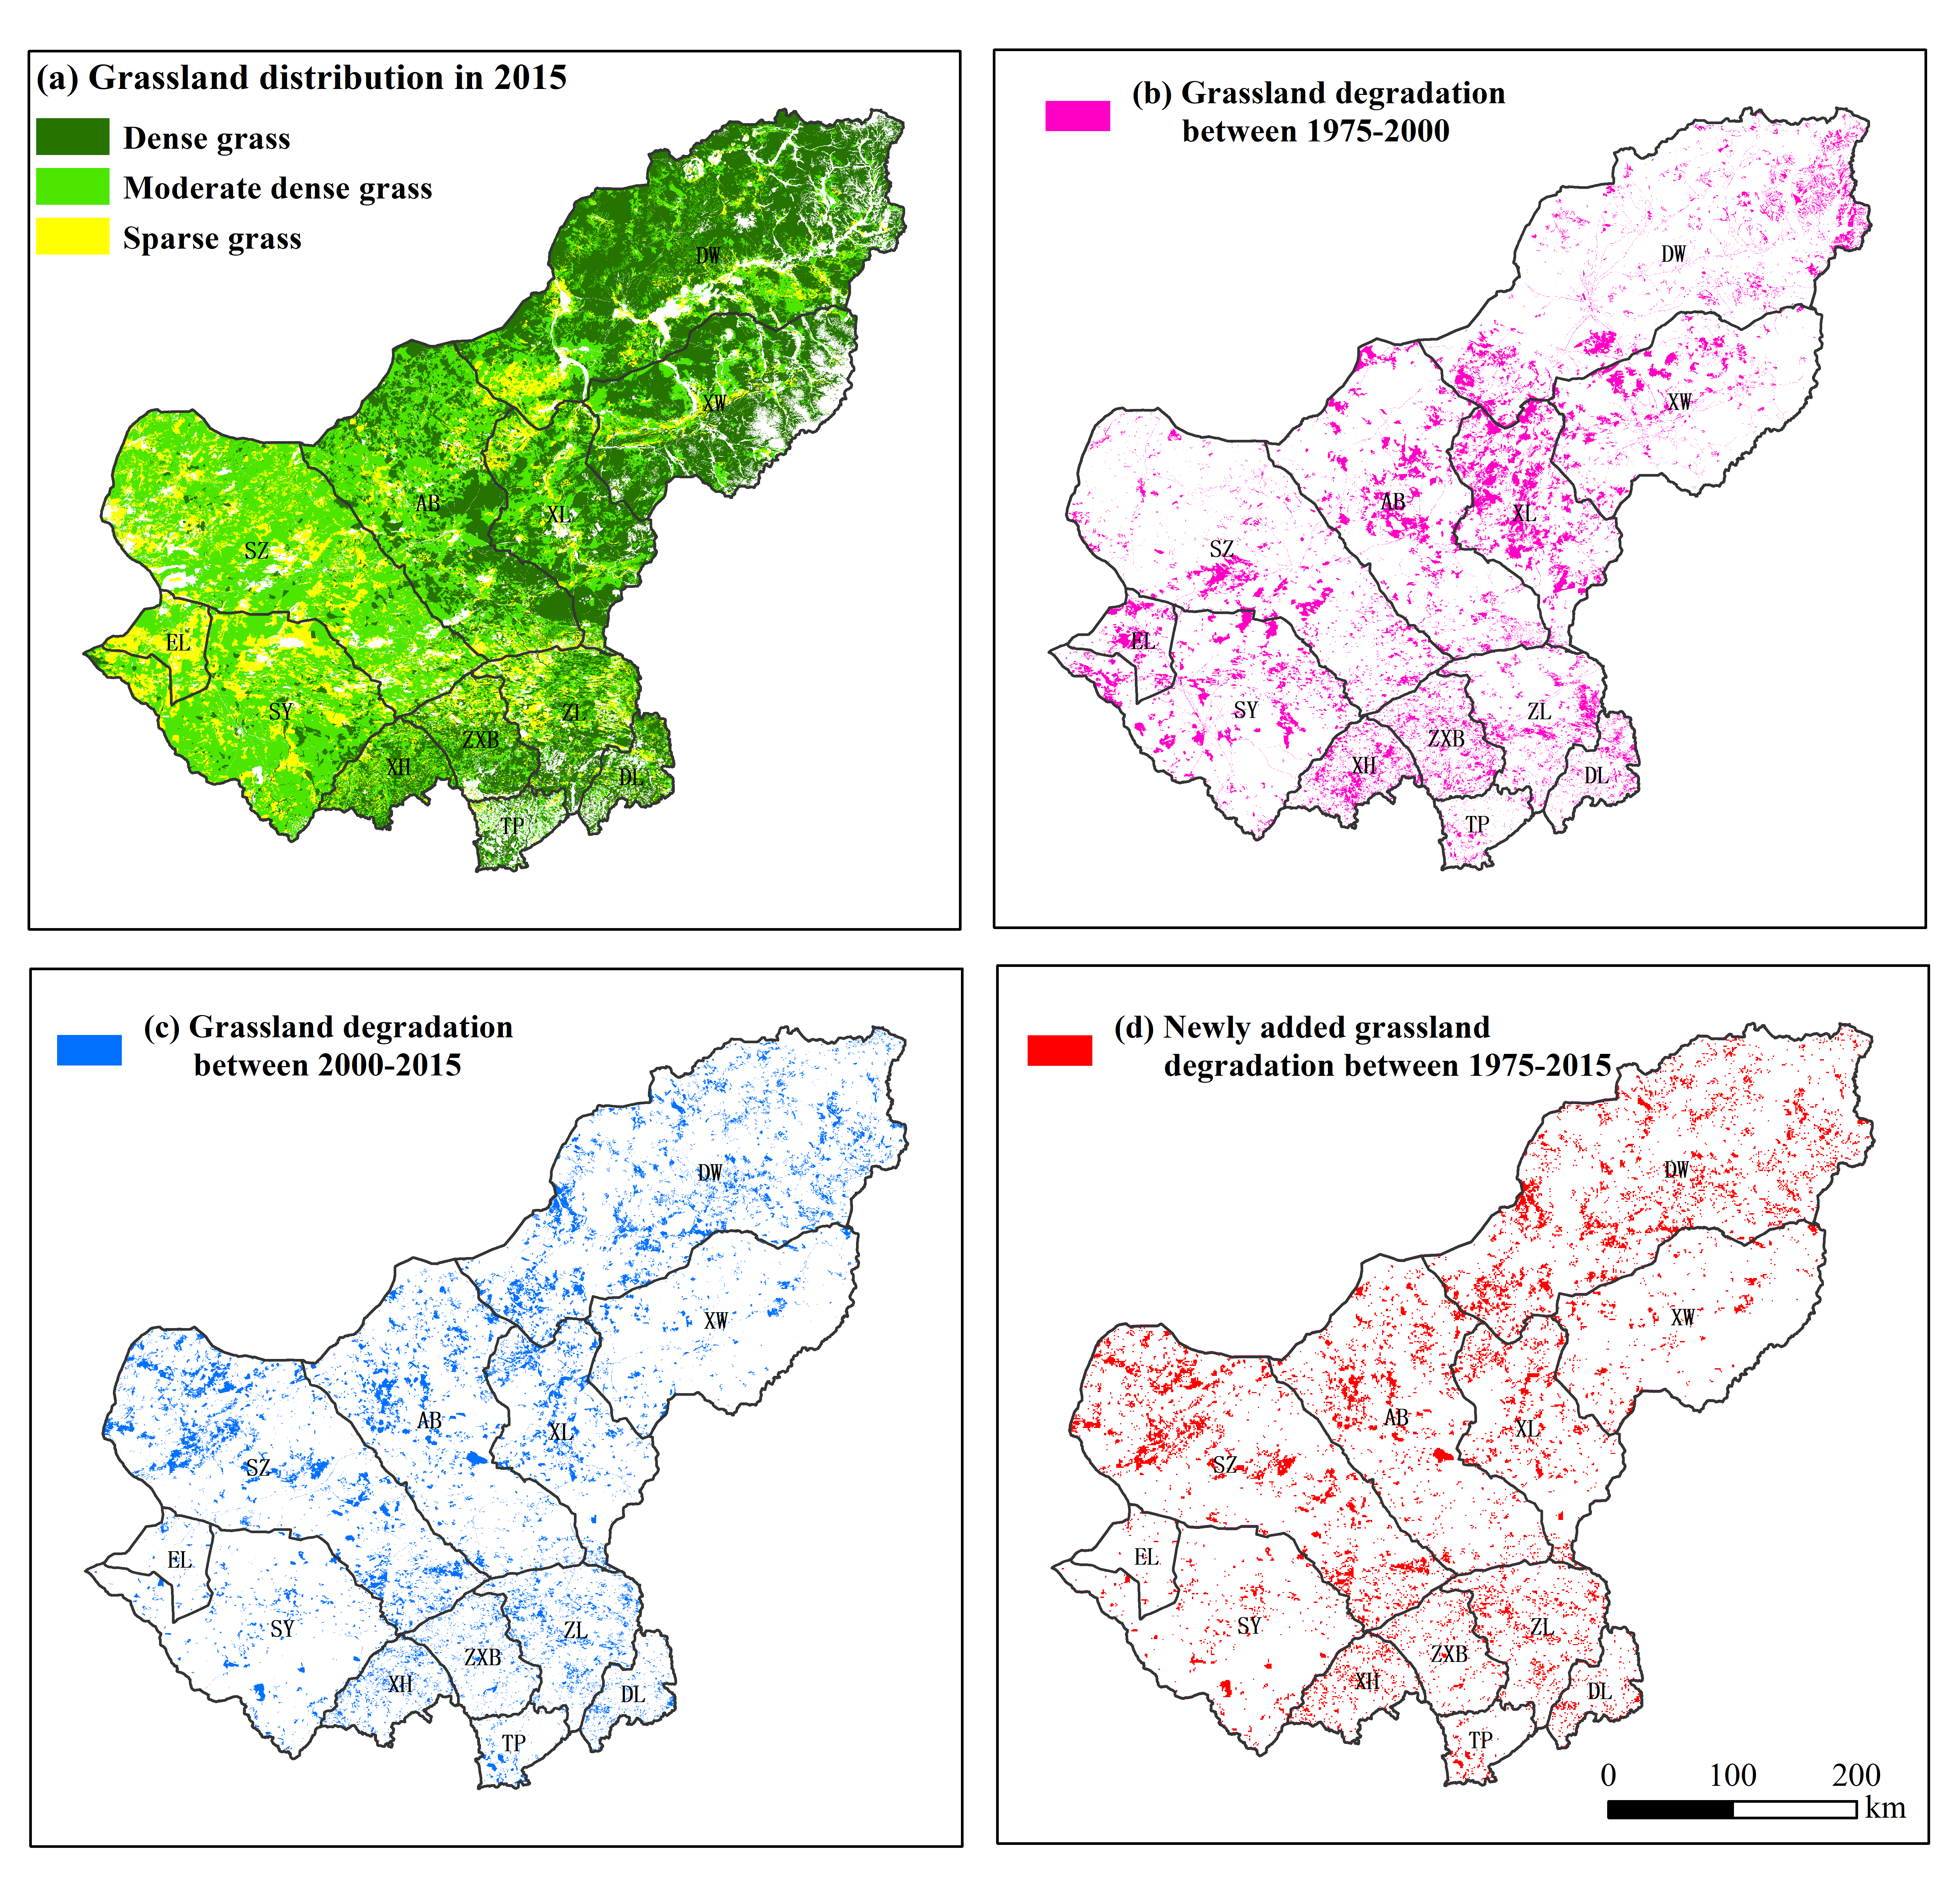

Supplement: Supplementary file 2 [file gmd-14-1493-2021-supplement.zip › Fig. S1 Grassland degradation between 1975 and 2015.tif]

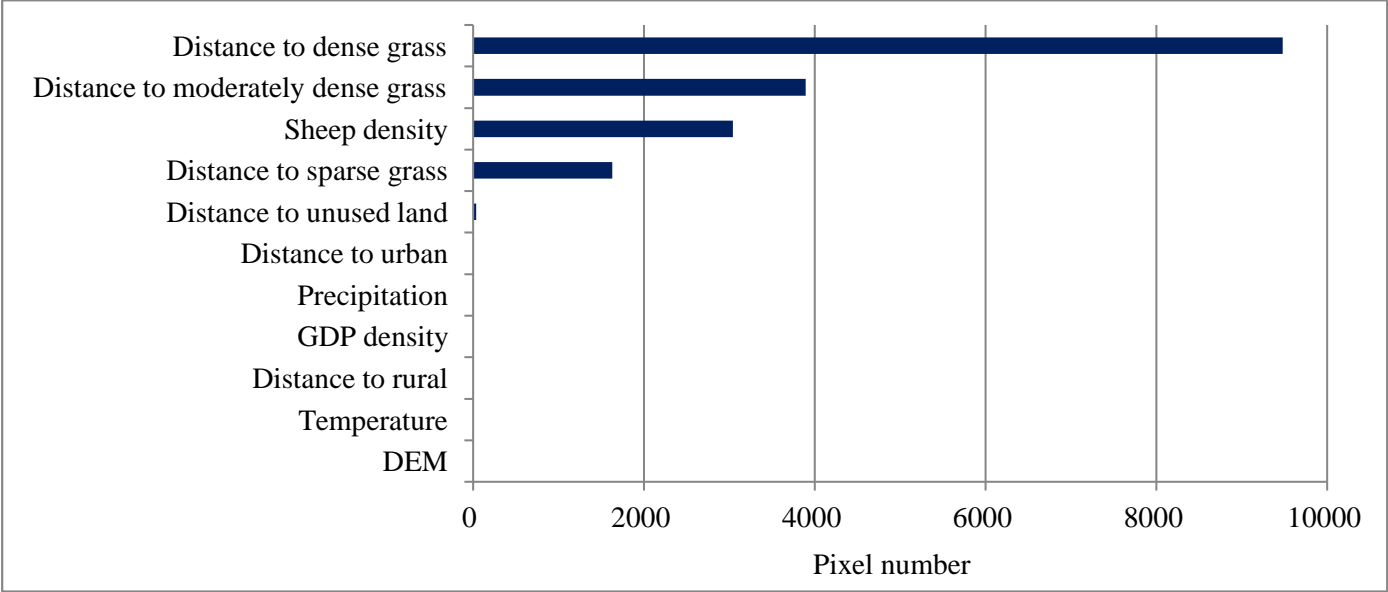

Supplement: Supplementary file 2 [file gmd-14-1493-2021-supplement.zip › Fig. S7 The number of pixels in which a driver is dominant. This analysis is limited to only the primary drivers.pdf]

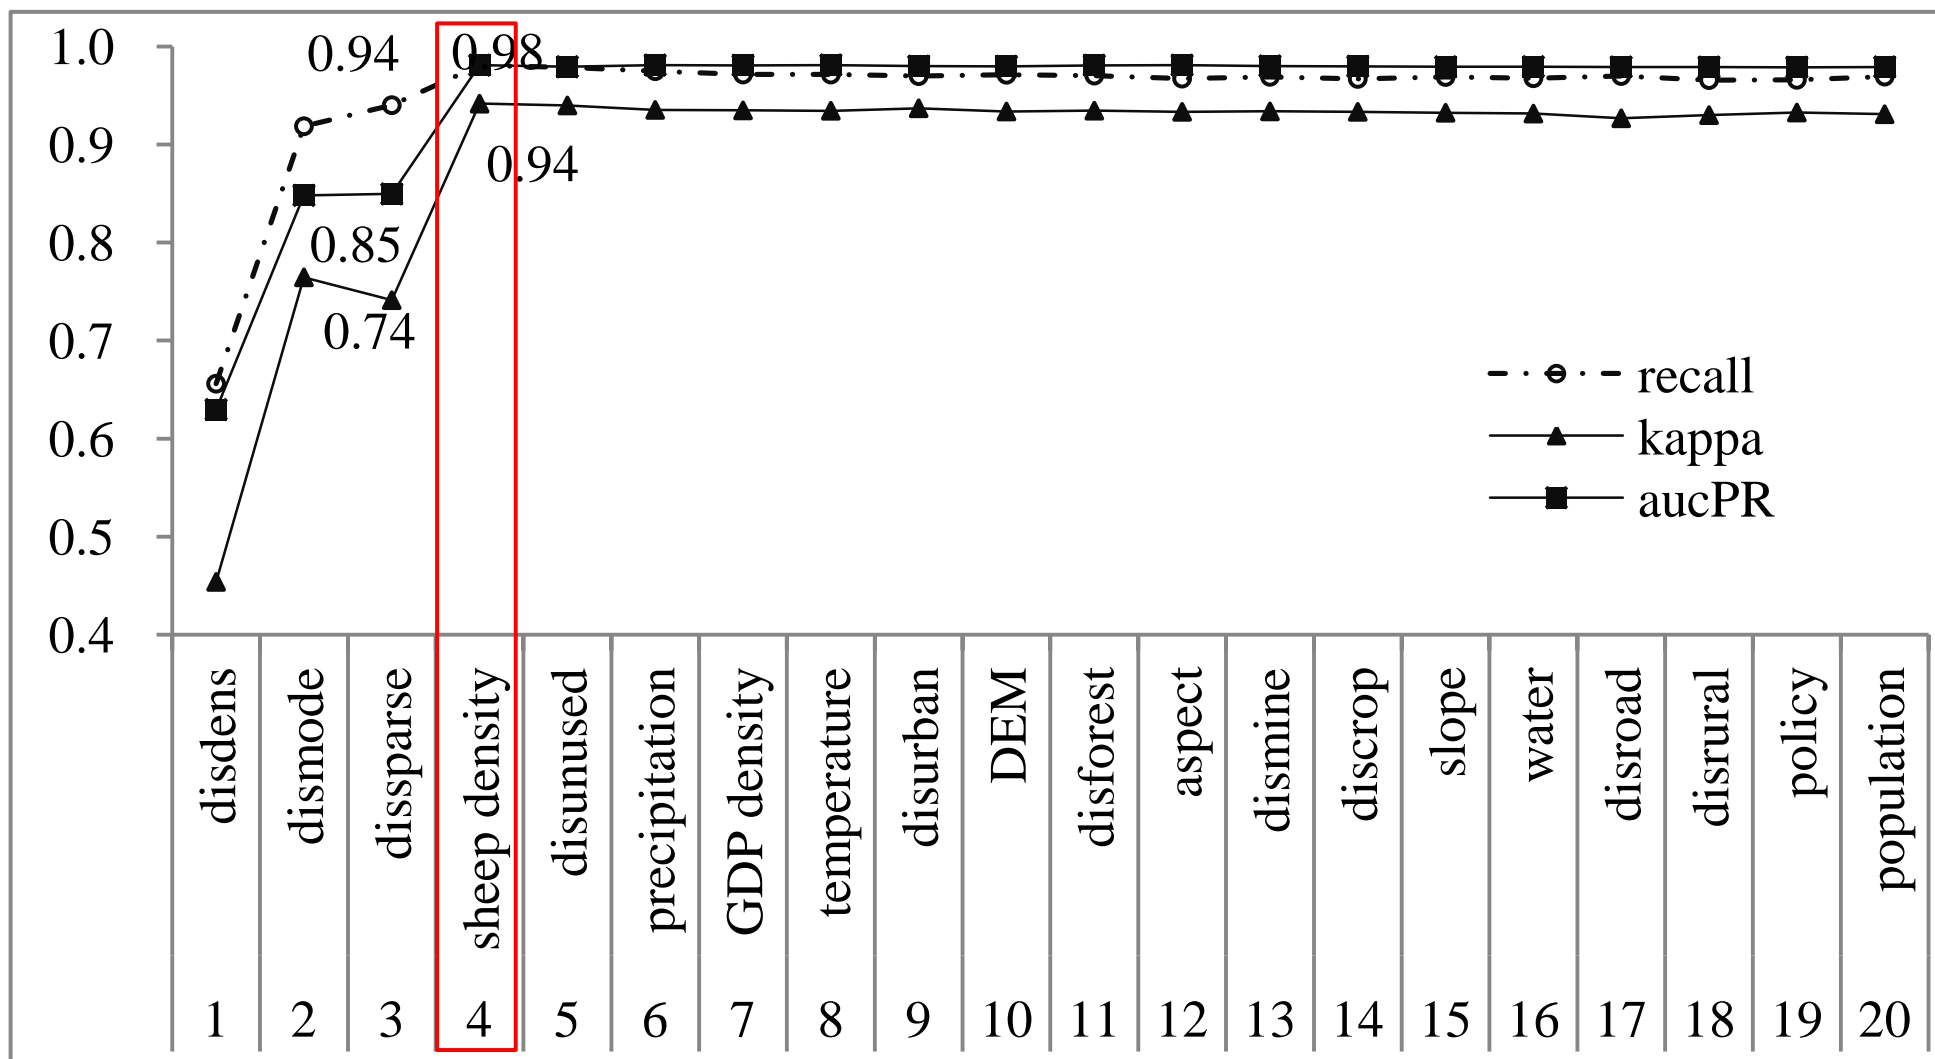

Supplement: Supplementary file 2 [file gmd-14-1493-2021-supplement.zip › Fig. S5 Values obtained for a-, recall and ACC using the recursive elimination method.pdf]
